# Supplementary material
Source: PubMed Central journal article supplement (PMC5389473)
Supplement: gkw1257_Supp.pdf [file gkw1257_Supp.pdf]

## Supplementary Information

**Supplementary Table S1. Quantitation of pol  $\beta$  in mouse fibroblast cells by immunoblotting**

| Cell line                       | Relative pol $\beta$ |
|---------------------------------|----------------------|
| <i>pol</i> $\beta^{+/+}$        | 0.53                 |
| <i>pol</i> $\beta^{-/-}$        | 0                    |
| <i>pol</i> $\beta$ WT 96        | 0.48                 |
| <i>pol</i> $\beta$ (R4S,K5S) 18 | 0.53                 |

Wild-type, *pol*  $\beta$  null (-/-), *pol*  $\beta$  WT 96, and *pol*  $\beta$ (R4S,K5S) 18 cells were seeded in 100 mm dishes at  $10^6$  cells/dish and harvested when cells were 90% confluent. Cells were washed in phosphate buffered saline (PBS) and collected by scraping, suspended in two volumes of lysis buffer (50 mM Tris-HCl, pH 7.5, 150 mM NaCl, 0.2% Triton X-100, and 0.3% NP-40) containing 1 x Halt protease and phosphatase inhibitors (ThermoFisher) and incubated on ice for 30 min. After agitating the tubes briefly, the lysates were centrifuged at  $20,800 \times g$  for 15 min at  $4^\circ C$ , and the supernatant fraction was removed. Protein concentrations were determined using the Bio-Rad protein assay with bovine serum albumin (BSA) as standard.

60  $\mu g$  of prepared cell lysates were separated by 4-20% Tris-Glycine SDS-PAGE. The proteins were then transferred onto a nitrocellulose membrane with a Trans-Blot Turbo transfer system using the standard 30 min setting for mini blots. The membrane was blocked with 5% nonfat dry milk in Tris-buffered saline (TBS) containing 0.1% (v/v) Tween-20 (TBS-T) and probed with the anti-*pol*  $\beta$  [18S] monoclonal antibody (ab3181, 1:500 dilution; Abcam). Detection was by ECL following incubation with secondary antibody conjugated to HRP. Membrane was imaged using the ChemiDoc MP (Bio-Rad) imager. The blot was stripped with Gentle Review Stripping buffer (VWR) for 30 min at  $37^\circ C$ , then washed twice for 30 min with room temperature TBS-T. After stripping, the membrane was then probed with anti-Tubulin (1:10,000; Sigma-Aldrich) as a loading control.

Quantification of *pol*  $\beta$  protein bands was conducted by densitometry using the Band Analysis tools of ImageLab software version 4.1 (Bio-Rad). Density of *pol*  $\beta$  bands was divided by the density of the loading control for each cell line of interest.

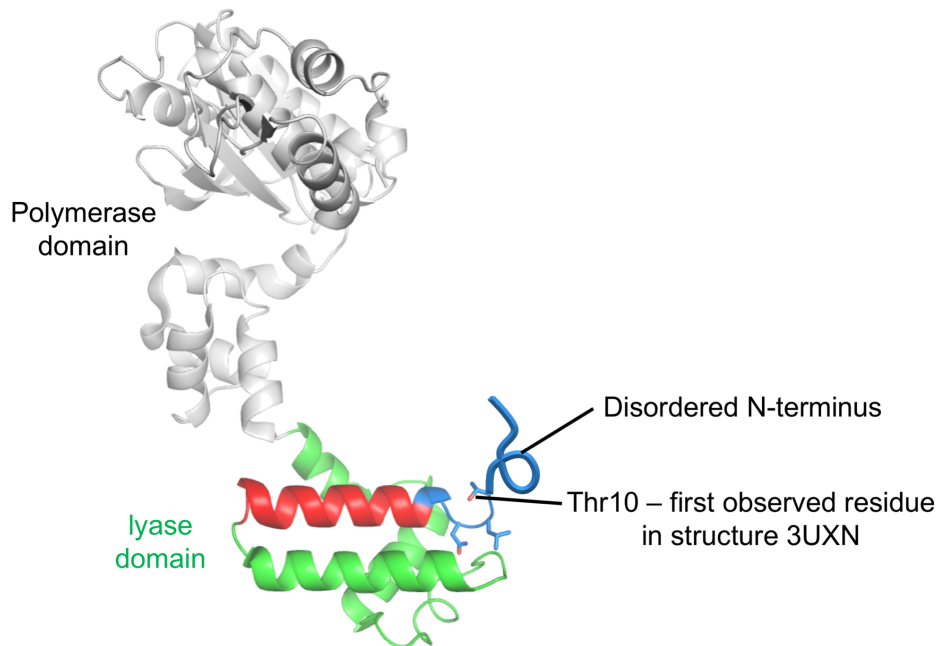

**NLS Mapper-identified bipartite sequence:** KRKAPQETLNGGITDMLTELANFEKNVS

**NLS Sequence studied in this paper:** SKRKAPQETLNGG

**Supplementary Figure S1.** Ribbon diagram of unliganded pol β showing the polymerase (gray) and lyase (green) domains. The N-terminal bipartite sequence identified by NLS Mapper (red + blue residues) includes the entire N-terminal helix (helix A). Interaction with the nuclear transport proteins would require complete unfolding of helix A and, in turn, the entire N-terminal lyase domain. Alternatively, the N-terminal sequence shown in blue includes several basic residues and is mostly disordered making it available for interaction with Impα.

**Supplementary Figure S2. Interaction of pol  $\beta$  lyase domain with mlmp $\alpha$ 1 $\Delta$ IBB.** A sample of mlmp $\alpha$ 1 $\Delta$ IBB was mixed with 2.8-fold excess of pol  $\beta$  lyase domain and the sample was eluted on a HiLoad 26/60 Superdex 200 column (GE Healthcare) with a buffer containing 20 mM Tris-HCL, pH 7.8, 125 mM NaCl, 2 mM DTT, 1 mM EDTA. SDS PAGE shows that the complex elutes in fractions 28-32 which contain both proteins while the excess pol  $\beta$  lyase domain elutes in fractions 41-43.

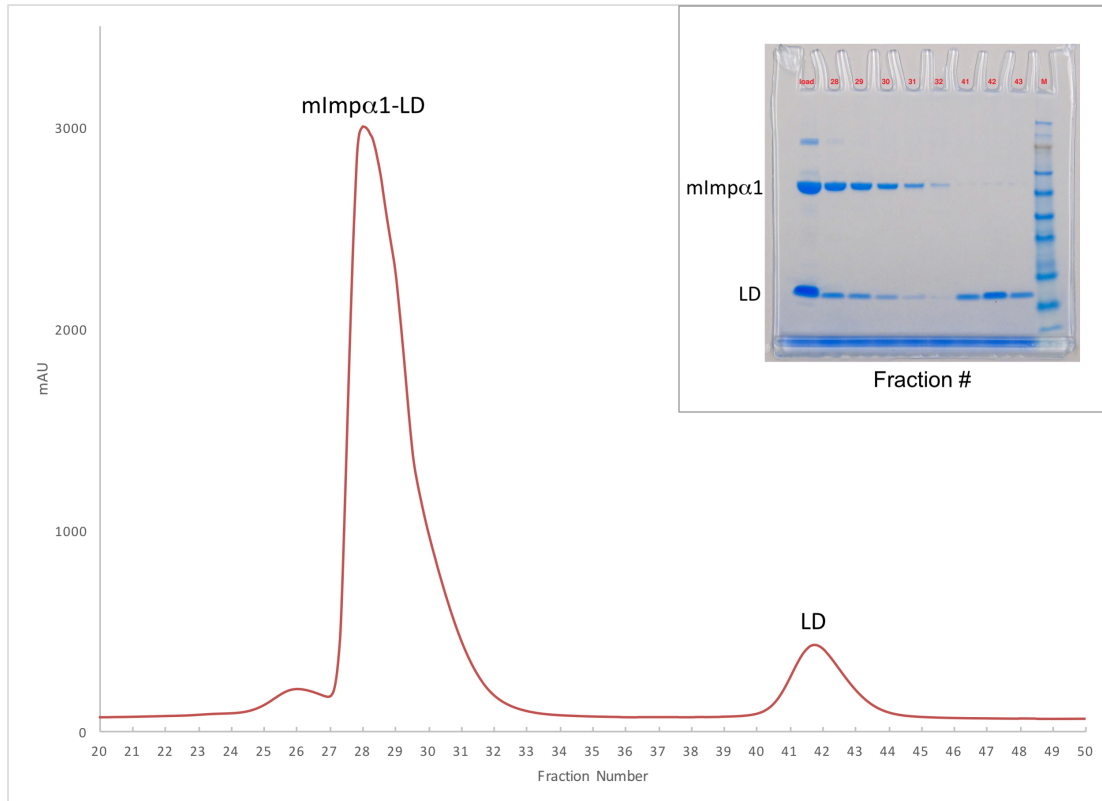

**Supplementary Figure S3. Expanded region of the  $^1\text{H}$ - $^{15}\text{N}$  HSQC NMR spectrum of the pol  $\beta$ -mlmp $\alpha$ 1 $\Delta$ IBB complex.** The expanded spectral region corresponds to the sample shown in Figure 1A. Blue spectrum: U- $[\text{}^2\text{H}, \text{}^{15}\text{N}]$ pol  $\beta$ ; red spectrum: U- $[\text{}^2\text{H}, \text{}^{15}\text{N}]$ pol  $\beta$  + mlmp $\alpha$ 1 $\Delta$ IBB. Circled peaks correspond to lyase domain resonances that become broadened in the mlmp $\alpha$ 1 $\Delta$ IBB complex, while a few resonances (such as Lys52 indicated by a square) resist most of the broadening, probably due to greater internal motional freedom.

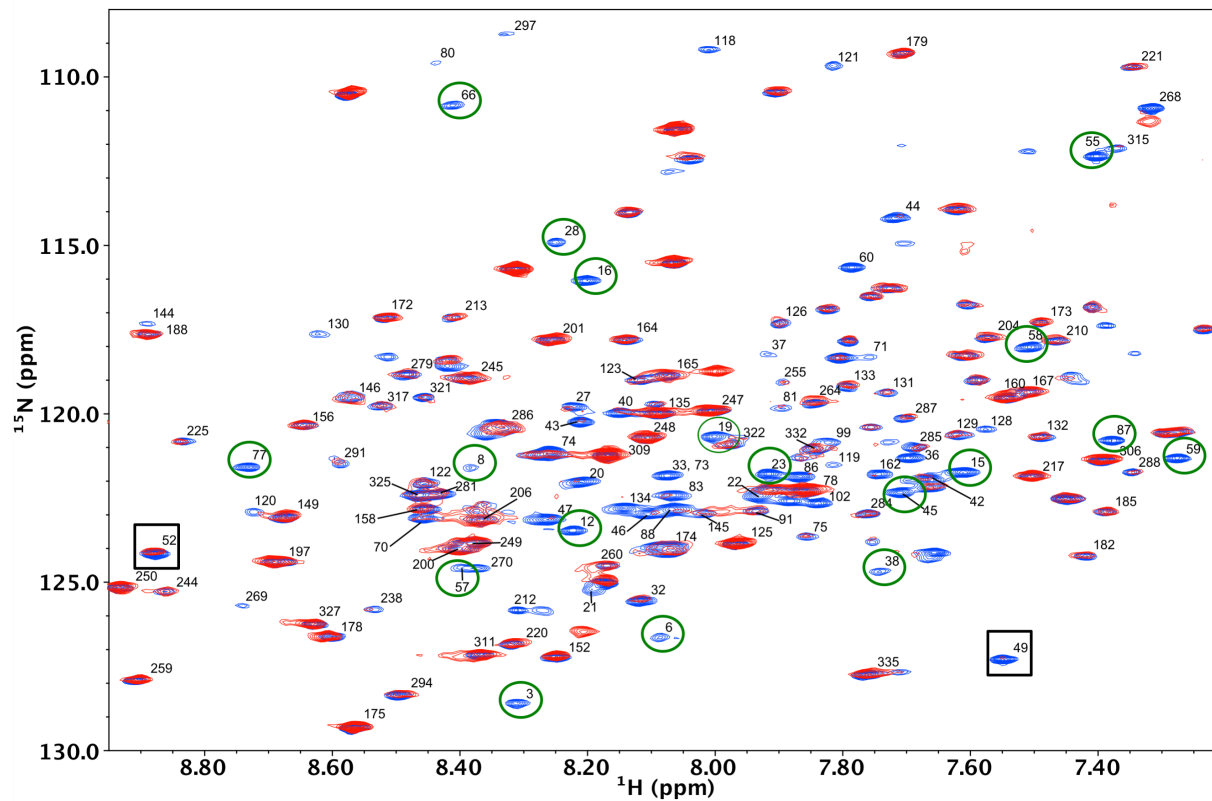

**Supplementary Figure S4. Interaction of the pol  $\beta$  lyase domain with Imp $\alpha$ 5.** Analytical gel filtration experiments performed on mixtures of hImp $\alpha$ 5 $\Delta$ IBB and either wild-type or pol  $\beta$  (R4S,K5S) lyase domain. For these experiments, hImp $\alpha$ 5 $\Delta$ IBB was mixed with 2-fold excess of wild-type or the NLS variant pol  $\beta$  (R4S,K5S) lyase domain and the samples were eluted at a flow rate of 1 ml/min on a Superdex 200 10/300 GL column (GE Healthcare) with a buffer containing 20 mM HEPES, 125 mM NaCl, 5mM DTT, 1mM EDTA, pH 7.4.

A) Imp $\alpha$ 5 $\Delta$ IBB elutes as a single entity; B) a complex of Imp $\alpha$ 5 $\Delta$ IBB with pol  $\beta$  lyase domain elutes earlier than Imp $\alpha$ 5 $\Delta$ IBB alone; C) a mixture of Imp $\alpha$ 5 $\Delta$ IBB with pol  $\beta$  (R4S,K5S) lyase domain elutes as two separate proteins—no complex is formed; the vertical line in each chromatogram shows the elution position of the Imp $\alpha$ 5 $\Delta$ IBB peak (panels A and C) or the Imp $\alpha$ 5 $\Delta$ IBB/pol  $\beta$  lyase domain (panel B); D) SDS PAGE confirms the coelution of Imp $\alpha$ 5 $\Delta$ IBB and wild-type pol  $\beta$  lyase domain; E) SDS PAGE confirms that Imp $\alpha$ 5 $\Delta$ IBB and pol  $\beta$  (R4S,K5S) lyase domain do not form a complex.

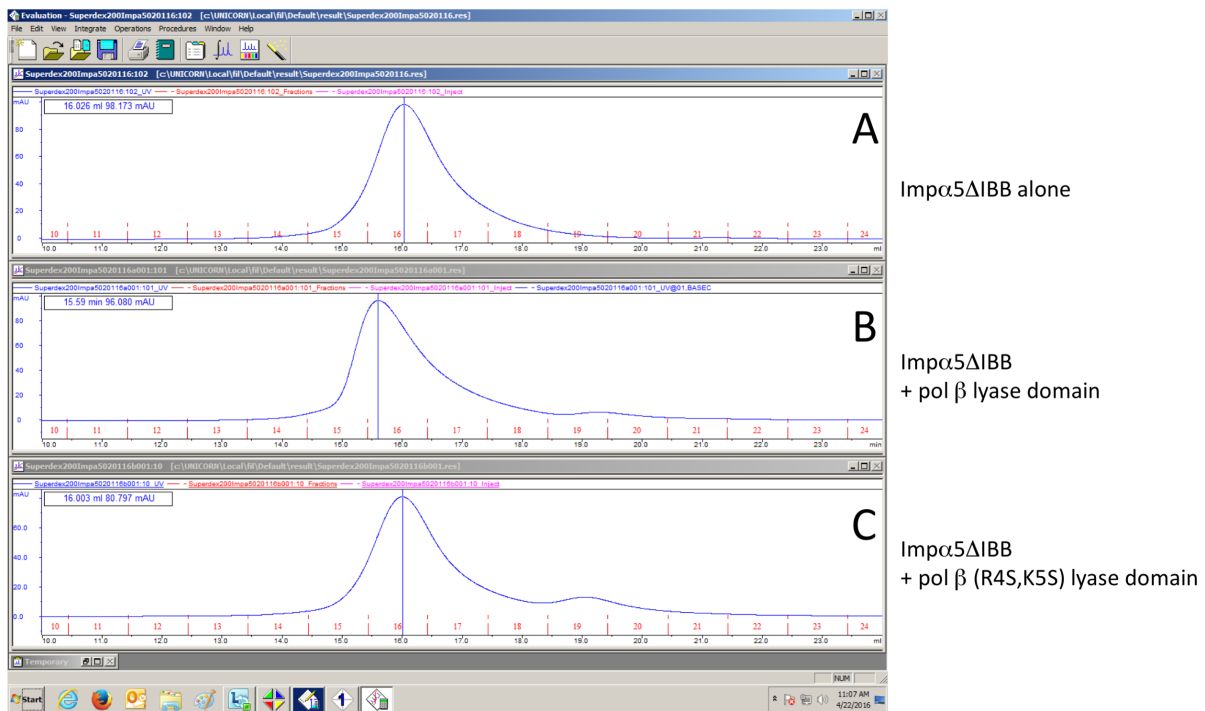

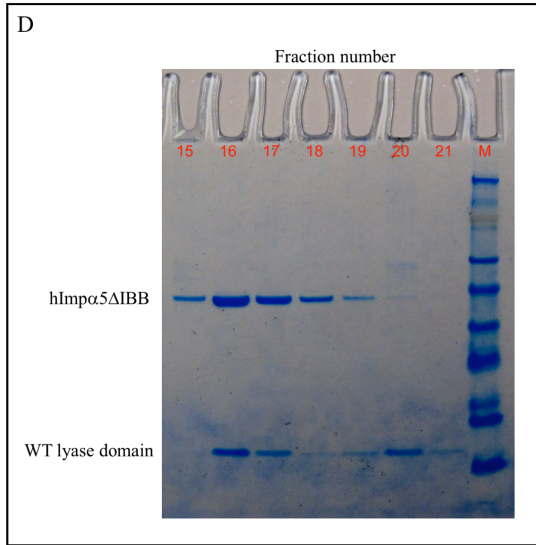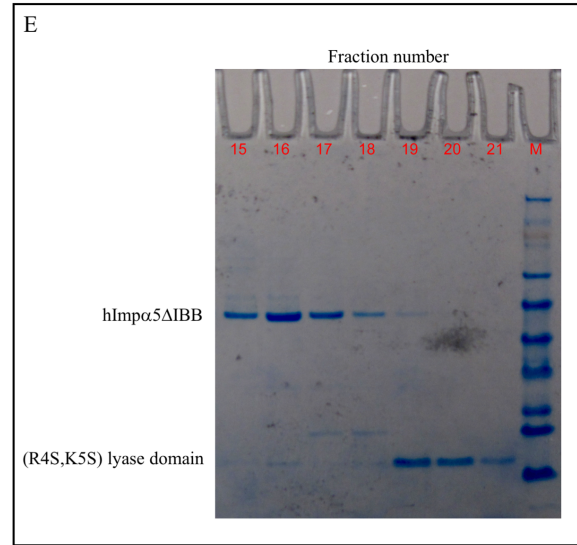

**Supplementary Figure S5. Localization of pol  $\beta$  in *Xrcc1*<sup>-/-</sup> cells.** The nuclear/cytoplasmic pol  $\beta$  ratio obtained in the *Xrcc1*<sup>-/-</sup> cell line,  $\beta_N/\beta_C = 3.4 \pm 0.13$  (n=74) is similar to the value obtained in the *Xrcc1*<sup>-/-</sup> cells transfected with XRCC1,  $\beta_N/\beta_C = 3.77 \pm 0.28$  (n = 50), where n is the number of cells evaluated and results are given as the ratio  $\pm$  standard error. Scale bar is 10  $\mu$ m. Cotransport behavior (or its absence) is not expected to vary with the R4S,K5S mutations; N-terminal pol  $\beta$  mutations will not affect the interaction with XRCC1, since this interaction involves only the C-terminal nucleotide-binding subdomain of pol  $\beta$ .

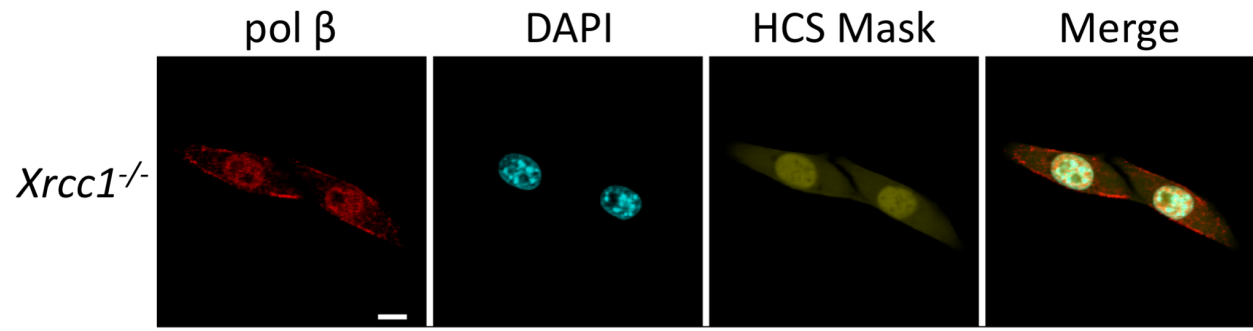

**Supplementary Figure S6. Sequence alignment of pol  $\beta$  N-terminal residues.** A comparison of the N-terminal sequences of pol  $\beta$  from multiple species shows that the NLS sequence is highly conserved among mammals, fish, birds, amphibians, reptiles, and insects. The amino acid abbreviations in red show the instances of variation from the sequence of pol  $\beta$  of rat.

## NLS

|                                   |                    |
|-----------------------------------|--------------------|
| MSKRKAPQETLNGGITDMLVELANFEKNVSQ   | Rat                |
| MSKRKAPQETLNGGITDMLVELANFEKNVSQ   | Mouse              |
| MSKRKAPQETLNGGITDMLMELANFEKNVSQ   | Naked mole-rat     |
| MSKRKAPQETLNGGITDMLTELANFEKNVSQ   | Human              |
| MSKRKAPQETLNGGITDMLTELANFEKNVSQ   | Rhesus macaque     |
| MSKRKAPQETLNGGITDMLTELANFEKNVNH   | Cattle             |
| MSKRKAPQETLNEGITDFLIELANYEKNVNR   | Channel catfish    |
| MSKRKAPQESLNEGITDFLVELANYERNVNR   | Zebrafish          |
| MSKRKAPQESLNQGITDFLMVELANYERNVSR  | Chicken            |
| MSKRKAPQESLNEGITDFLVELANYERNVNR   | Frog               |
| MSKRKAPQESLNEGITDFLIELANYERNVNR   | Spotted gar        |
| MSKRKAPQQTLNEGITDFLTELANYERNVNR   | African coelacanth |
| MSKRKAPREGPNEGITDFLTELANYERNVSR   | Alligator          |
| MGKRKAPSDDNLNQDFCDFLNELADYEKNVNR  | Assasin bug        |
| MSKRKNPSDDNNLNSDFCDFLMELAEYEKNVSR | Winter moth        |
